# Supplementary material for: Residual Dipolar Couplings for Resolving Cysteine Bridges in Disulfide-Rich Peptides
Source: PubMed Central journal article supplement (PMC6987419; doi:10.3389/fchem.2019.00889), 2020-01-22
Supplement: Data_Sheet_1.pdf [file Data_Sheet_1.pdf]

# **Residual dipolar couplings for resolving cysteine bridges in disulfide-rich peptides**

Venkatraman Ramanujam<sup>1,2</sup>, Yang Shen<sup>2</sup>, Jinfu Ying<sup>2</sup>, & Mehdi Mobli<sup>1\*</sup>

1. *Centre for Advanced Imaging, The University of Queensland, St Lucia, 4072, Queensland, Australia*
2. *Laboratory of Chemical Physics, National Institute of Diabetes and Digestive and Kidney Diseases, Bethesda, MD 20892, USA*

**Correspondence:** Mehdi Mobli, [m.mobli@uq.edu.au](mailto:m.mobli@uq.edu.au)

## Figures

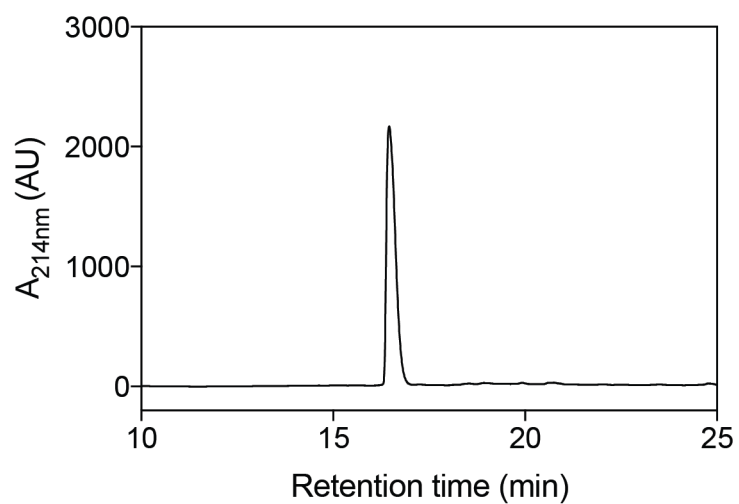

**Figure S1.** Purity of recombinantly produced Ta1a. Purified Ta1a elutes as single isoform at 16.4 min corresponding to 25.5% acetonitrile concentration in C3 semi-prep column.

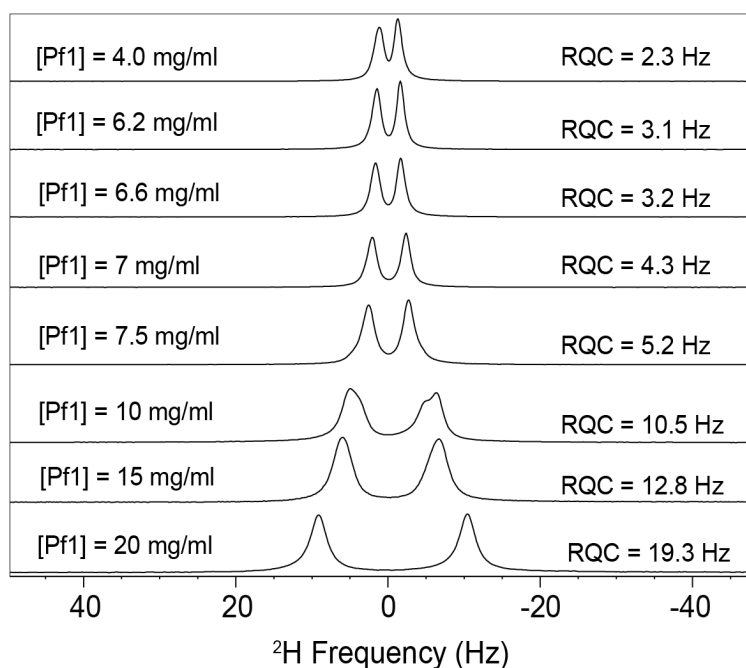

**Figure S2.** Residual  $^2\text{H}$  quadrupolar coupling (RQC) as a function of Pf1 phage concentration in the sample containing  $^{13}\text{C}/^{15}\text{N}$  labeled Ta1a in 20 mM phosphate buffer, 5%  $\text{D}_2\text{O}$ , pH 6.2 measured at 298K in 600 MHz. One dimensional  $^2\text{H}$  spectra of Ta1a sample at various Pf1 concentrations and its corresponding  $^2\text{H}$  splitting.

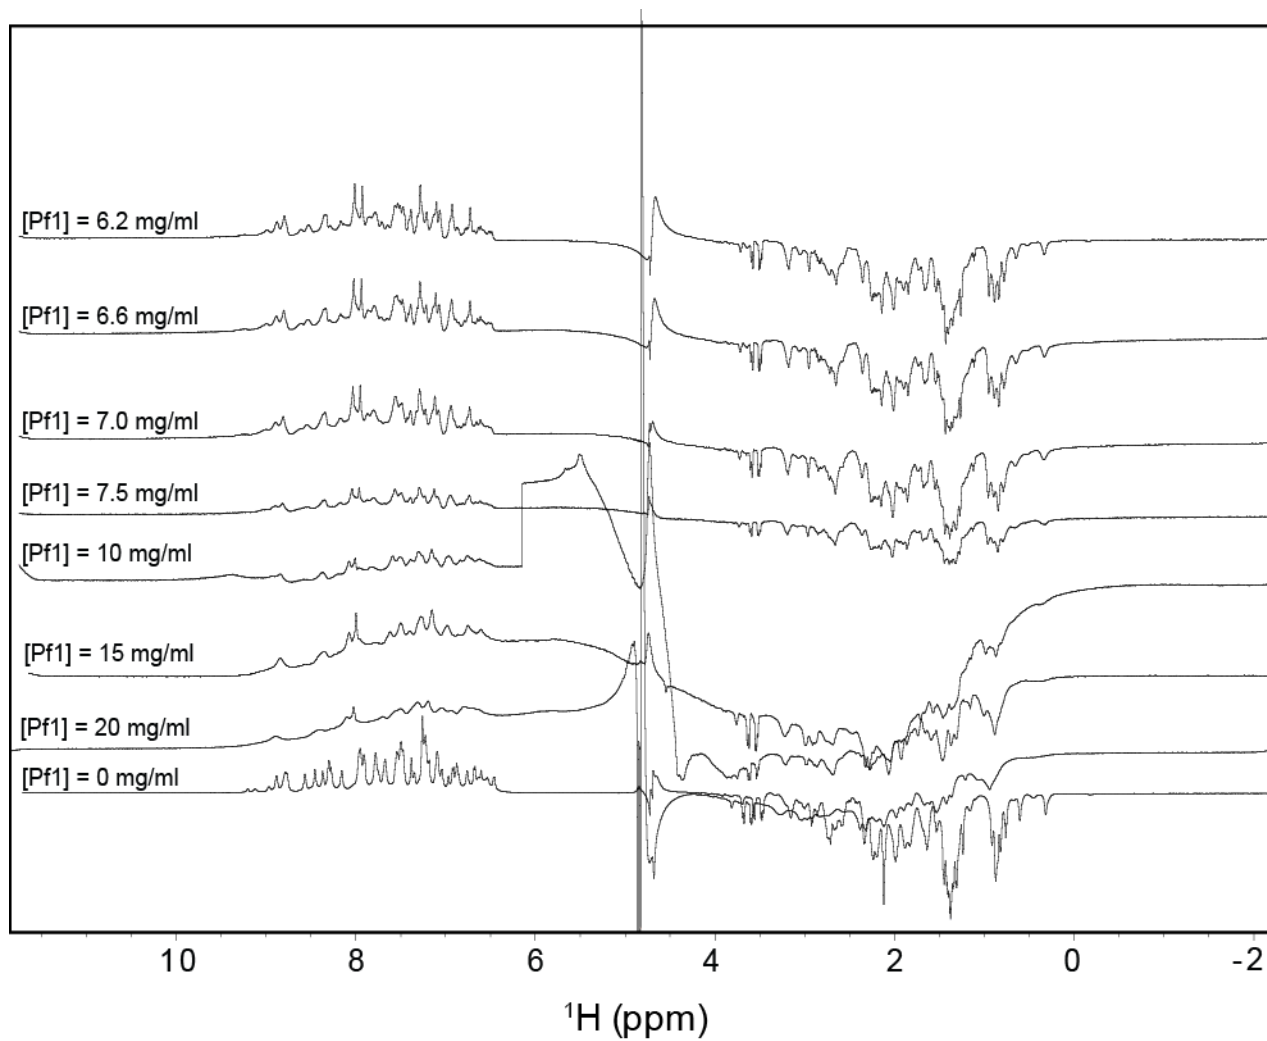

**Figure S3.**  $^1\text{H}$  NMR spectrum, one-one echo sequence (Sklenář and Bax, 1987), of Ta1a aligned in different concentrations of Pfl phage.

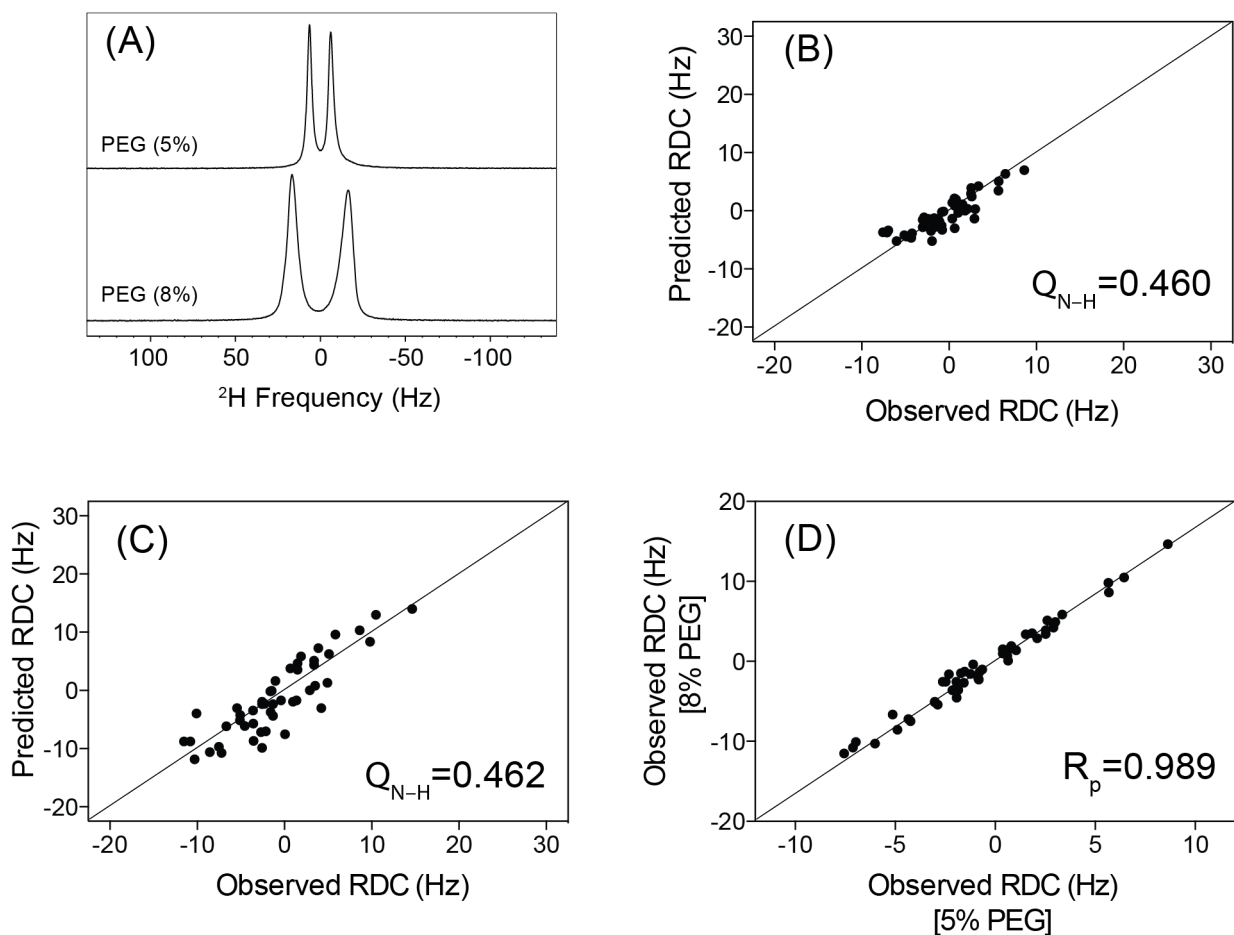

**Figure S4.** Optimization of PEG concentration for RDC measurements in Ta1a. (A)  $^2\text{H}$  spectra of uniformly  $^{15}\text{N}$  labeled Ta1a aligned in 5% and 8% PEG solution showing an RQC of 13.0 and 32.1 Hz respectively. (B&C) Scatter plot of correlation between experimental and structure based  $^1\text{D}_{\text{NH}}$  in 5% and 8% PEG solution respectively. (D) Correlation plot of  $^1\text{D}_{\text{NH}}$  observed for 5% and 8% PEG solution.

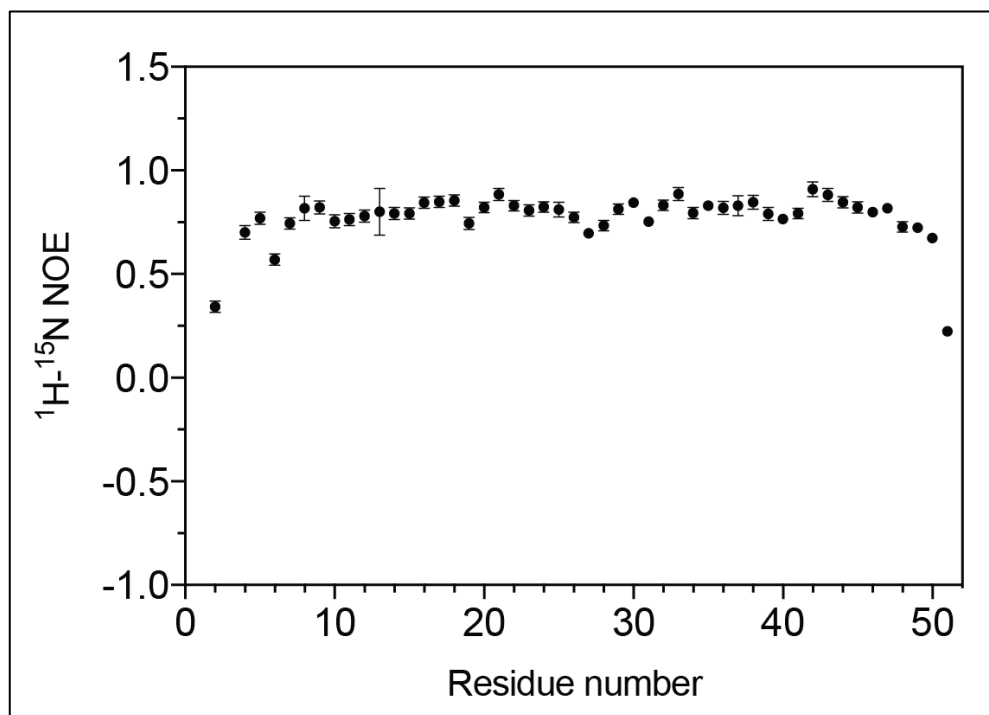

**Figure S5**  $^1\text{H}$ - $^{15}\text{N}$  steady state NOE for Ta1a at a field-strength of 900 MHz. Data were acquired at 25°C using a 200  $\mu\text{M}$  sample of  $^{15}\text{N}$  labeled Ta1a. The errors are a function of the S/N in the acquired spectra.

## Tables

**Table S1.** Summary of NMR spectra recorded for Ta1a sample.

| Expt. No | Spectra                               | <i>J</i> -coupling type                                                         | <sup>1</sup> H frequency / MHz |     |     |
|----------|---------------------------------------|---------------------------------------------------------------------------------|--------------------------------|-----|-----|
|          |                                       |                                                                                 | Isotropic                      | Pf1 | PEG |
| 1        | IPAP-HSQC                             | <sup>1</sup> <i>J</i> <sub>NH</sub>                                             | 900                            | 600 | 600 |
| 2        | HNCO                                  | <sup>1</sup> <i>J</i> <sub>CαC'</sub>                                           | 600                            | 600 | 600 |
| 3        | CT-HN(CO)CA                           | <sup>1</sup> <i>J</i> <sub>CαHα</sub>                                           | 600                            | 600 | 600 |
| 4        | <sup>1</sup> H- <sup>15</sup> N TROSY | <sup>1</sup> <i>J</i> <sub>NC'</sub>                                            | 600                            | 600 | 600 |
| 5        | CT-HN(COCA)CB                         | <sup>1</sup> <i>J</i> <sub>CβHβ2</sub> + <sup>1</sup> <i>J</i> <sub>CβHβ3</sub> | 700                            | 600 | -   |
| 6        | HA[HB,HN](CACO)NH                     | <sup>3</sup> <i>J</i> <sub>HαHβ</sub>                                           | 700                            | -   | -   |
| 7        | HNHB                                  | <sup>3</sup> <i>J</i> <sub>NHβ</sub>                                            | 900                            | -   | -   |

**Table S2.** Experimental acquisition parameters for NMR experiments conducted. The  $^{15}\text{N}$  carrier frequency was set 116.5 ppm, the  $^{13}\text{C}\alpha$  to 56 ppm, the  $^{13}\text{C}'$  to 177 and the  $\text{C}\alpha\text{-C}\beta$  to 41. Where values deviate from these, these are provided in the Materials & Methods section of the manuscript. The number of samples refers to complex points, the number of increments is half of this value in traditional sampling.

|                                              |           | t1              | t2              | t3           | Scans | Inter-scan delay (s) | $^1\text{H}$ Freq. (MHz) |
|----------------------------------------------|-----------|-----------------|-----------------|--------------|-------|----------------------|--------------------------|
| 3D CT HNCA (isotropic & anisotropic)         | Nucl.     | $^{13}\text{C}$ | $^{15}\text{N}$ | $^1\text{H}$ | 4     | 1.5                  | 600.1                    |
|                                              | Samples   | 202             | 110             | 2048         |       |                      |                          |
|                                              | Acq. (ms) | 26.7            | 39.3            | 122.9        |       |                      |                          |
| 2D IPAP-HSQC - isotropic                     | Nucl.     | $^{15}\text{N}$ | $^1\text{H}$    |              | 8     | 1.5                  | 900.1                    |
|                                              | Samples   | 1600            | 2048            |              |       |                      |                          |
|                                              | Acq. (ms) | 336.0           | 94.6            |              |       |                      |                          |
| 2D IPAP-HSQC - anisotropic                   | Nucl.     | $^{15}\text{N}$ | $^1\text{H}$    |              | 32    | 1.5                  | 600.4                    |
|                                              | Samples   | 1000            | 1600            |              |       |                      |                          |
|                                              | Acq. (ms) | 311.8           | 95.0            |              |       |                      |                          |
| 3D CT-HN(CO)CA - isotropic                   | Nucl.     | $^{13}\text{C}$ | $^{15}\text{N}$ | $^1\text{H}$ | 4     | 1.5                  | 600.4                    |
|                                              | Samples   | 200             | 110             | 2048         |       |                      |                          |
|                                              | Acq. (ms) | 28.0            | 39.3            | 122.9        |       |                      |                          |
| 3D CT-HN(CO)CA – anisotropic (Pfl)           | Nucl.     | $^{13}\text{C}$ | $^{15}\text{N}$ | $^1\text{H}$ | 8     | 1.5                  | 600.4                    |
|                                              | Samples   | 166             | 110             | 2048         |       |                      |                          |
|                                              | Acq. (ms) | 23.2            | 39.3            | 122.9        |       |                      |                          |
| 3D CT-HN(CO)CA – anisotropic (PEG)           | Nucl.     | $^{13}\text{C}$ | $^{15}\text{N}$ | $^1\text{H}$ | 8     | 1.5                  | 600.4                    |
|                                              | Samples   | 200             | 110             | 2048         |       |                      |                          |
|                                              | Acq. (ms) | 28.0            | 39.3            | 122.9        |       |                      |                          |
| 3D CT-HNCO – anisotropic                     | Nucl.     | $^{13}\text{C}$ | $^{15}\text{N}$ | $^1\text{H}$ | 4     | 1.5                  | 600.4                    |
|                                              | Samples   | 280             | 116             | 2048         |       |                      |                          |
|                                              | Acq. (ms) | 102.8           | 41.4            | 127.8        |       |                      |                          |
| 3D CT-HNCO – isotropic                       | Nucl.     | $^{13}\text{C}$ | $^{15}\text{N}$ | $^1\text{H}$ | 4     | 1.5                  | 600.4                    |
|                                              | Samples   | 3192 NUS        |                 | 2048         |       |                      |                          |
|                                              | Acq. (ms) | 102.8           | 41.4            | 127.8        |       |                      |                          |
| 3D CT-HN(COCA)CB - isotropic                 | Nucl.     | $^{13}\text{C}$ | $^{15}\text{N}$ | $^1\text{H}$ | 2     | 1.35                 | 700.2                    |
|                                              | Samples   | 538             | 90              | 2048         |       |                      |                          |
|                                              | Acq. (ms) | 26.9            | 27.5            | 112.6        |       |                      |                          |
| 3D CT-HN(COCA)CB – anisotropic (Pfl)         | Nucl.     | $^{13}\text{C}$ | $^{15}\text{N}$ | $^1\text{H}$ | 8     | 1.5                  | 600.1                    |
|                                              | Samples   | 534             | 44              | 2048         |       |                      |                          |
|                                              | Acq. (ms) | 26.7            | 11.3            | 136.5        |       |                      |                          |
| 3D HA[HB,HN] (CACO)NH                        | Nucl.     | $^{15}\text{N}$ | $^1\text{H}$    | $^1\text{H}$ | 8     | 1.5                  | 700.2                    |
|                                              | Samples   | 56              | 270             | 2048         |       |                      |                          |
|                                              | Acq. (ms) | 17.1            | 20.3            | 112.6        |       |                      |                          |
| 3D HNHB                                      | Nucl.     | $^{15}\text{N}$ | $^1\text{H}$    | $^1\text{H}$ | 16    | 1.5                  | 900.1                    |
|                                              | Samples   | 40              | 128             | 2048         |       |                      |                          |
|                                              | Acq. (ms) | 6.1             | 7.1             | 81.1         |       |                      |                          |
| 2D $^{15}\text{N}$ -HSQC (Heteronuclear NOE) | Nucl.     | $^{15}\text{N}$ | $^1\text{H}$    |              | 32    | 4                    | 900.1                    |
|                                              | Samples   | 200             | 2048            |              |       |                      |                          |
|                                              | Acq. (ms) | 43.8            | 81.9            |              |       |                      |                          |
| $^{13}\text{C}$ HSQC-NOESY                   | Nucl.     | $^1\text{H}$    | $^{13}\text{C}$ | $^1\text{H}$ | 8     | 1                    | 900.1                    |
|                                              | Samples   | 112             | 56              | 2048         |       |                      |                          |
|                                              | Acq. (ms) | 5.4             | 1.5             | 75.8         |       |                      |                          |
| $^{15}\text{N}$ HSQC-NOESY                   | Nucl.     | $^{15}\text{N}$ | $^1\text{H}$    | $^1\text{H}$ | 16    | 1.5                  | 900.1                    |
|                                              | Samples   | 136             | 80              | 2048         |       |                      |                          |
|                                              | Acq. (ms) | 6.3             | 15.7            | 75.8         |       |                      |                          |



**Table S3.**  $\chi_1$  classification using  $J$ -couplings for  $\beta$ -methylene protons containing residues in Tala.

| Res <sup>#</sup> | AA type          | $^3J_{\text{H}\alpha\text{H}\beta 2}$    |                     | $^3J_{\text{H}\alpha\text{H}\beta 3}$    |                     | $^3J_{\text{N-H}\beta 2}$ | $^3J_{\text{N-H}\beta 3}$ | $\chi_1$ |
|------------------|------------------|------------------------------------------|---------------------|------------------------------------------|---------------------|---------------------------|---------------------------|----------|
|                  |                  | $^3J_{\text{H}\alpha\text{H}\beta 2}$ Hz | upl <sup>a</sup> Hz | $^3J_{\text{H}\alpha\text{H}\beta 3}$ Hz | upl <sup>a</sup> Hz |                           |                           |          |
| 1                | SER <sup>b</sup> | 6.96                                     | 7.04                | n.d <sup>c</sup>                         | 4.78                | – <sup>d</sup>            | –                         | average  |
| 2                | GLU <sup>b</sup> | –                                        | –                   | –                                        | –                   | medium                    | medium                    | average  |
| 3                | PRO <sup>b</sup> | 6.96                                     | 6.98                | 6.33                                     | 6.62                | –                         | –                         | average  |
| 4                | ASP <sup>b</sup> | 6.39                                     | 6.42                | 5.50                                     | 5.64                | large                     | small                     | average  |
| 5                | GLU <sup>c</sup> | 8.64                                     | 8.64                | n.c <sup>f</sup>                         | n.c                 | n.q <sup>f</sup>          | n.q                       | n.c      |
| 7                | CYS <sup>b</sup> | 8.27                                     | 8.37                | 6.73                                     | 6.89                | medium                    | medium                    | average  |
| 8                | ARG <sup>b</sup> | 7.93                                     | 7.99                | 5.63                                     | 5.89                | medium                    | medium                    | average  |
| 10               | ARG <sup>b</sup> | 8.33                                     | 8.42                | n.d                                      | 3.69                | n.a <sup>g</sup>          | n.a                       | average  |
| 11               | MET <sup>b</sup> | 5.78                                     | 5.96                | n.d                                      | 3.96                | medium                    | medium                    | average  |
| 13               | HIS <sup>e</sup> | 8.81                                     | 9.06                | n.c                                      | n.c                 | n.q                       | n.q                       | n.c      |
| 14               | LYS <sup>b</sup> | 7.22                                     | 7.39                | 6.49                                     | 6.51                | medium                    | medium                    | average  |
| 15               | GLU <sup>b</sup> | 7.57                                     | 7.61                | 6.67                                     | 6.71                | medium                    | medium                    | average  |
| 16               | PHE              | n.d                                      | 4.54                | 10.81                                    | 10.84               | small                     | small                     | 180°     |
| 17               | ASN              | 9.18                                     | 9.21                | n.c                                      | n.c                 | n.q                       | n.q                       | n.c      |
| 18               | TYR              | n.d                                      | 4.21                | 10.12                                    | 10.12               | small                     | small                     | 180°     |
| 19               | LYS              | 11.03                                    | 11.20               | n.d                                      | 4.84                | small                     | large                     | -60°     |
| 20               | SER <sup>b</sup> | n.d                                      | 5.22                | n.d                                      | 5.22                | medium                    | medium                    | average  |
| 21               | ASN <sup>b</sup> | 8.09                                     | 8.25                | 6.44                                     | 6.50                | medium                    | medium                    | average  |
| 23               | CYS              | 11.27                                    | 11.28               | n.d                                      | 4.80                | small                     | large                     | -60°     |
| 24               | ASN <sup>e</sup> | 8.42                                     | 8.48                | n.c                                      | n.c                 | n.q                       | n.q                       | n.c      |
| 26               | CYS              | n.d                                      | 4.04                | 9.46                                     | 9.48                | small                     | small                     | 180°     |

|    |                  |       |       |       |       |        |        |         |
|----|------------------|-------|-------|-------|-------|--------|--------|---------|
| 28 | ASP <sup>b</sup> | 6.42  | 6.70  | n.d   | 3.50  | medium | medium | average |
| 29 | GLN              | 10.73 | 10.77 | n.d   | 4.32  | small  | large  | -60°    |
| 33 | CYS              | n.d   | 4.78  | 10.57 | 10.63 | small  | small  | 180°    |
| 34 | GLU              | 9.49  | 9.71  | 4.01  | 4.01  | small  | large  | -60°    |
| 36 | GLU              | 9.23  | 9.31  | n.d   | 5.30  | small  | large  | -60°    |
| 37 | CYS <sup>b</sup> | 7.54  | 7.59  | n.d   | 5.37  | small  | small  | average |
| 38 | PHE              | 10.91 | 11.27 | n.d   | 5.59  | small  | large  | -60°    |
| 39 | ARG <sup>e</sup> | 8.32  | 8.42  | n.c   | n.c   | n.q    | n.q    | n.c     |
| 40 | ASN              | 4.52  | 4.80  | 3.48  | 3.70  | large  | small  | 60°     |
| 41 | ASP              | 10.37 | 10.48 | 4.86  | 5.11  | small  | large  | -60°    |
| 43 | TYR              | 4.75  | 5.13  | 10.83 | 11.02 | small  | small  | 180°    |
| 46 | CYS              | 10.31 | 10.32 | n.d   | 3.83  | small  | large  | -60°    |
| 47 | HIS              | 5.59  | 5.92  | 10.92 | 11.05 | small  | small  | 180°    |
| 48 | GLU <sup>c</sup> | 9.20  | 9.27  | n.c   | n.c   | n.q    | n.q    | n.c     |
| 50 | GLN              | 8.69  | 8.75  | 4.18  | 4.21  | small  | large  | -60°    |
| 51 | LYS <sup>b</sup> | –     | –     | –     | –     | medium | medium | average |

<sup>a</sup>calculated from the lowest contour level without seeing a peak; <sup>b</sup>stereospecific designations not meaningful; <sup>c</sup>not detected. i.e. below the signal-to-noise threshold; <sup>d</sup>couplings involving resonances non-observable; <sup>e</sup>residues with degenerate H<sub>β2</sub>/H<sub>β3</sub> chemical shifts; <sup>f</sup>not calculated (or not qualitatively assigned) due to overlap of H<sub>β2</sub> and H<sub>β3</sub> chemical shifts; <sup>g</sup>not measured due to overlap of the diagonal signal.

**Table S4** Classification of  $\chi_1$  torsion angles for  $\beta$ -methine proton containing residues in Ta1a.

| Res <sup>#</sup> | AA type | $^3J_{\text{H}\alpha\text{H}\beta}$ / Hz | $^3J_{\text{H}\alpha\text{H}\beta}$ |                  |
|------------------|---------|------------------------------------------|-------------------------------------|------------------|
|                  |         |                                          | upl <sup>a</sup> / Hz               | $\chi_1$ / (deg) |
| 6                | ILE     | 8.21                                     | 8.32                                | average          |
| 12               | THR     | n.d <sup>b</sup>                         | 6.22                                | average          |
| 22               | VAL     | 9.72                                     | 9.80                                | 180°             |
| 30               | VAL     | 7.18                                     | 7.29                                | average          |
| 42               | VAL     | 10.63                                    | 10.68                               | 180°             |
| 44               | THR     | 8.29                                     | 8.34                                | -60°             |

<sup>a</sup>calculated from the lowest contour level without seeing a peak; <sup>b</sup>not detected. i.e. below the signal-to-noise threshold.

**Table S5**  $\chi_1$  Classification using  $^1\text{H}$ - $^1\text{H}$  NOEs for  $\beta$ -methylene protons in Tala.

| Res <sup>#</sup> | AA type          | $d_{\alpha\beta 2}(i,i)$ | $d_{\alpha\beta 3}(i,i)$ | $d_{N\beta 2}(i,i)$ | $d_{N\beta 3}(i,i)$ | $\chi_1$ (deg)   |
|------------------|------------------|--------------------------|--------------------------|---------------------|---------------------|------------------|
| 1                | SER <sup>a</sup> | strong                   | weak                     | — <sup>c</sup>      | —                   | n.c <sup>e</sup> |
| 2                | GLU <sup>a</sup> | strong                   | weak                     | n.d <sup>d</sup>    | n.d                 | n.c              |
| 3                | PRO <sup>a</sup> | strong                   | weak                     | —                   | —                   | n.c              |
| 4                | ASP <sup>a</sup> | strong                   | strong                   | strong              | medium              | average          |
| 5                | GLU <sup>b</sup> | n.q <sup>e</sup>         | n.q                      | n.q                 | n.q                 | n.c              |
| 7                | CYS <sup>a</sup> | strong                   | strong                   | strong              | strong              | average          |
| 8                | ARG <sup>a</sup> | weak                     | strong                   | medium              | strong              | average          |
| 10               | ARG <sup>a</sup> | strong                   | weak                     | strong              | weak                | average          |
| 11               | MET <sup>a</sup> | strong                   | strong                   | strong              | weak                | average          |
| 13               | HIS <sup>b</sup> | n.q                      | n.q                      | n.d                 | n.d                 | n.c              |
| 14               | LYS <sup>a</sup> | weak                     | strong                   | strong              | strong              | average          |
| 15               | GLU <sup>a</sup> | strong                   | strong                   | strong              | strong              | average          |
| 16               | PHE              | strong                   | weak                     | strong              | strong              | 180°             |
| 17               | ASN <sup>b</sup> | n.q                      | n.q                      | n.q                 | n.q                 | n.c              |
| 18               | TYR              | strong                   | weak                     | strong              | strong              | 180°             |
| 19               | LYS              | weak                     | strong                   | strong              | weak                | -60°             |
| 20               | SER <sup>a</sup> | strong                   | weak                     | weak                | strong              | average          |
| 21               | ASN <sup>a</sup> | strong                   | weak                     | strong              | weak                | average          |
| 23               | CYS              | weak                     | strong                   | strong              | weak                | -60°             |
| 24               | ASN <sup>b</sup> | n.q                      | n.q                      | n.q                 | n.q                 | n.c              |
| 26               | CYS              | strong                   | weak                     | strong              | medium              | 180°             |
| 28               | ASP <sup>a</sup> | strong                   | strong                   | medium              | strong              | average          |
| 29               | GLN              | weak                     | strong                   | strong              | medium              | -60°             |
| 33               | CYS              | strong                   | weak                     | strong              | strong              | 180°             |
| 34               | GLU              | weak                     | strong                   | strong              | weak                | -60°             |
| 36               | GLU              | weak                     | strong                   | weak                | strong              | average          |

|    |                  |        |        |        |        |         |
|----|------------------|--------|--------|--------|--------|---------|
| 37 | CYS <sup>a</sup> | strong | strong | medium | strong | average |
| 38 | PHE              | weak   | strong | weak   | strong | average |
| 39 | ARG <sup>b</sup> | n.q    | n.q    | n.q    | n.q    | n.c     |
| 40 | ASN              | strong | strong | medium | strong | 60°     |
| 41 | ASP              | weak   | strong | medium | strong | average |
| 43 | TYR              | strong | weak   | medium | strong | 180°    |
| 46 | CYS              | weak   | strong | strong | weak   | -60°    |
| 47 | HIS              | strong | weak   | medium | strong | 180°    |
| 48 | GLU <sup>b</sup> | n.q    | n.q    | n.q    | n.q    | n.q     |
| 50 | GLN              | weak   | strong | strong | weak   | -60°    |
| 51 | LYS <sup>a</sup> | weak   | strong | weak   | strong | average |

<sup>a</sup>stereospecific designations not meaningful; <sup>b</sup>residues with degenerate H<sub>β2</sub>/H<sub>β3</sub> chemical shifts; <sup>c</sup>couplings involving resonances non-observable; <sup>d</sup>not detected; <sup>e</sup>not calculated (or peak quality not qualitatively assigned) due to peak overlap.

**Table S6** Estimation of  $\chi_1$  angles from one-bond dipolar couplings. The sum of the  $C_{\beta}$ - $H_{\beta 2}$  and  $C_{\beta}$ - $H_{\beta 3}$  residual dipolar couplings (RDCs) are compared to sums of pairs of backbone RDCs. Close agreement indicates

| Residue | $\chi_1 \sim 180^\circ$                            | $\chi_1 \sim 60^\circ$                                 | $\chi_1 \sim -60^\circ$                               | $\Sigma D_{C\beta H\beta}$<br>(Hz) | $\chi_1^c$<br>(deg) |
|---------|----------------------------------------------------|--------------------------------------------------------|-------------------------------------------------------|------------------------------------|---------------------|
|         | $D_{C\alpha H\alpha} + D_{(C\alpha C')^b}$<br>(Hz) | $D_{C\alpha H\alpha} + D_{(C\alpha C')^{a,b}}$<br>(Hz) | $D_{(C\alpha C')^b} + D_{(C\alpha C')^{a,b}}$<br>(Hz) |                                    |                     |
| Phe-16  | 3.35                                               | 49.50                                                  | 30.38                                                 | <b>-2.40</b>                       | $180^\circ$         |
| Cys-26  | 13.92                                              | -9.83                                                  | 77.46                                                 | <b>26.75</b>                       | $180^\circ$         |
| Asn-40  | -59.52                                             | 26.65                                                  | 18.77                                                 | <b>26.15</b>                       | $60^\circ$          |
| Tyr-43  | -56.73                                             | 1.96                                                   | -3.73                                                 | <b>-58.69</b>                      | $180^\circ$         |
| His-47  | -54.36                                             | 14.81                                                  | -3.63                                                 | <b>-56.60</b>                      | $180^\circ$         |

<sup>a</sup>obtained from the  $D_{C'C\alpha}$  of the preceding residue; <sup>b</sup>values normalized to  $D_{C\alpha H\alpha}$  by multiplication by 10.37; <sup>c</sup>estimated by comparing the  $\Sigma D_{C\beta H\beta}$  to backbone  $D_{C'C\alpha}$  and  $D_{C\alpha H\alpha}$ .

**Table S7.** Structural statistics for ensembles of Ta1a

|                                                      | Original structure | Refined structure |
|------------------------------------------------------|--------------------|-------------------|
| Experimental restraints                              |                    |                   |
| Distance restraints (CYANA)                          |                    |                   |
| Short-range ( $i-j \leq 1$ )                         | 349                | 350               |
| Medium-range ( $1 < i-j < 5$ )                       | 137                | 143               |
| Long-range ( $i-j \geq 5$ )                          | 88                 | 85                |
| Dihedral angle restraints                            | 93                 | 99                |
| Disulfide-bond restraints                            | 9                  | 9                 |
| RDC restraints                                       |                    |                   |
| $^1D_{NH}$                                           | -                  | 96                |
| $^1D_{C\alpha H\alpha}$                              | -                  | 96                |
| $^1D_{NC}$                                           | -                  | 88                |
| $^1D_{C\alpha C'}$                                   | -                  | 95                |
| $^1D_{(C\beta H\beta 2 + C\beta H\beta 3)}$          | -                  | 37                |
| Total number of restraints per residue               | 13.3               | 21.7              |
| Q-factor <sup>Pf1</sup>                              | 0.39               | 0.08              |
| Q-factor <sup>PEG</sup>                              | 0.58               | 0.21              |
| RMSD from mean structure in Å                        |                    |                   |
| (residues from 4 helices used and given in brackets) |                    |                   |
| Backbone atoms (5-10, 13-24, 30-35, 41-49)           | 0.41               | 0.24              |
| All heavy atoms (5-10, 13-24, 30-35, 41-49)          | 1.71               | 1.63              |

**Table S8** Classification of disulfide bonds in conformational categories (Schmidt et al., 2006) from NOE-derived structure of Tala.

| Ensemble structures <sup>a</sup> | Disulfide conformation <sup>b</sup> |                                      |                                      |
|----------------------------------|-------------------------------------|--------------------------------------|--------------------------------------|
|                                  | Cys <sub>7</sub> -Cys <sub>37</sub> | Cys <sub>23</sub> -Cys <sub>33</sub> | Cys <sub>26</sub> -Cys <sub>46</sub> |
| <i>Model 1</i>                   | <i>-RHHook</i>                      | <i>-LHSpiral</i>                     | <i>+/-RHSpiral</i>                   |
| <i>Model 2</i>                   | <i>-RHHook</i>                      | <i>-LHSpiral</i>                     | <i>+/-RHSpiral</i>                   |
| <i>Model 3</i>                   | <i>-RHHook</i>                      | <i>+/-LHSpiral</i>                   | <i>+/-RHSpiral</i>                   |
| <i>Model 4</i>                   | <i>-RHStaple</i>                    | <i>+/-LHSpiral</i>                   | <i>+/-RHSpiral</i>                   |
| <i>Model 5</i>                   | <i>-LHSpiral</i>                    | <i>+/-LHSpiral</i>                   | <i>+/-RHSpiral</i>                   |
| <i>Model 6</i>                   | <i>-RHStaple</i>                    | <i>-LHSpiral</i>                     | <i>+/-RHSpiral</i>                   |
| <i>Model 7</i>                   | <i>-LHSpiral</i>                    | <i>-LHSpiral</i>                     | <i>+/-RHSpiral</i>                   |
| <i>Model 8</i>                   | <i>-RHStaple</i>                    | <i>+/-LHSpiral</i>                   | <i>+/-RHSpiral</i>                   |
| <i>Model 9</i>                   | <i>-RHHook</i>                      | <i>-LHSpiral</i>                     | <i>+/-RHSpiral</i>                   |
| <i>Model 10</i>                  | <i>-RHStaple</i>                    | <i>-LHSpiral</i>                     | <i>+/-RHSpiral</i>                   |
| <i>Model 11</i>                  | <i>-RHHook</i>                      | <i>+/-LHSpiral</i>                   | <i>+/-RHSpiral</i>                   |
| <i>Model 12</i>                  | <i>-RHStaple</i>                    | <i>-LHSpiral</i>                     | <i>+/-RHSpiral</i>                   |
| <i>Model 13</i>                  | <i>-RHHook</i>                      | <i>+/-LHSpiral</i>                   | <i>+/-RHSpiral</i>                   |
| <i>Model 14</i>                  | <i>-LHSpiral</i>                    | <i>+/-LHSpiral</i>                   | <i>+/-RHSpiral</i>                   |
| <i>Model 15</i>                  | <i>-LHSpiral</i>                    | <i>-LHSpiral</i>                     | <i>+/-RHSpiral</i>                   |
| <i>Model 16</i>                  | <i>-RHHook</i>                      | <i>-LHSpiral</i>                     | <i>+/-RHSpiral</i>                   |
| <i>Model 17</i>                  | <i>-RHHook</i>                      | <i>-LHSpiral</i>                     | <i>+/-RHSpiral</i>                   |
| <i>Model 18</i>                  | <i>-RHHook</i>                      | <i>-LHSpiral</i>                     | <i>+/-RHSpiral</i>                   |
| <i>Model 19</i>                  | <i>-LHSpiral</i>                    | <i>+/-LHSpiral</i>                   | <i>+/-RHSpiral</i>                   |
| <i>Model 20</i>                  | <i>-RHStaple</i>                    | <i>-LHSpiral</i>                     | <i>+/-RHSpiral</i>                   |
| <i>Model 21</i>                  | <i>-LHSpiral</i>                    | <i>+/-LHSpiral</i>                   | <i>+/-RHSpiral</i>                   |
| <i>Model 22</i>                  | <i>-LHSpiral</i>                    | <i>-LHSpiral</i>                     | <i>+/-RHSpiral</i>                   |
| <i>Model 23</i>                  | <i>-RHHook</i>                      | <i>-LHSpiral</i>                     | <i>+/-RHSpiral</i>                   |
| <i>Model 24</i>                  | <i>-RHHook</i>                      | <i>-LHSpiral</i>                     | <i>+/-RHSpiral</i>                   |



|                 |                  |                  |                    |
|-----------------|------------------|------------------|--------------------|
| <i>Model 25</i> | <i>-RHStaple</i> | <i>-LHSpiral</i> | <i>+/-RHSpiral</i> |
|-----------------|------------------|------------------|--------------------|

<sup>a</sup>NOE-derived structure (PDB: 2KSL); <sup>b</sup>LH:Left handed oriented; RH:Right handed oriented; -:Negative value for the respective dihedral angle; +:Positive value for the respective dihedral angle.

## Reference

- Schmidt, B., Ho, L., and Hogg, P.J. (2006). Allosteric disulfide bonds. *Biochemistry* 45(24), 7429-7433. doi: 10.1021/bi0603064.
- Sklenář, V., and Bax, A. (1987). Spin-echo water suppression for the generation of pure-phase two-dimensional NMR spectra. *J Magn Reson (1969)* 74(3), 469-479. doi: 10.1016/0022-2364(87)90269-1.
